1 **Interaction of Amphiphilic Lipoarabinomannan**  
2 **with Host Carrier Lipoproteins in Tuberculosis**  
3 **Patients: Implications for Blood-based**  
4 **Diagnostics.**

5

6 Shailja Jakhar<sup>a</sup>, Ramamurthy Sakamuri<sup>a, b</sup>, Dung Vu<sup>a, d</sup>, Priya Dighe<sup>c</sup>, Loreen R.  
7 Stromberg<sup>a</sup>, Laura Lilley<sup>a</sup>, Nicolas Hengartner<sup>e</sup>, Basil I. Swanson<sup>c</sup>, Emmanuel  
8 Moreau<sup>f</sup>, Susan E. Dorman<sup>g</sup> and Harshini Mukundan<sup>a, #</sup>

9

10 <sup>a</sup> Physical Chemistry and Applied Spectroscopy, Chemistry Division, Los Alamos  
11 National Laboratory, Los Alamos, New Mexico, United States

12 <sup>b</sup> Bako Diagnostics, Georgia, United States

13 <sup>c</sup> Biosecurity and Public Health, Bioscience Division, Los Alamos National  
14 Laboratory, Los Alamos, New Mexico, United States

15 <sup>d</sup> Actinide Analytical chemistry, Chemistry Division, Los Alamos National  
16 Laboratory, Los Alamos, New Mexico, United States

17 <sup>e</sup> Theoretical Biology and Biophysics, Theory Division, Los Alamos National  
18 Laboratory, Los Alamos, New Mexico, United States

19 <sup>f</sup> Foundation for Innovative New Diagnostics, Geneva, Switzerland

20 <sup>g</sup> Department of Medicine, Medical University of South Carolina, Charleston, South  
21 Carolina, United States

22

23

24 # Corresponding Author: Tel. +1 (505) 606-2122; Email: [harshini@lanl.gov](mailto:harshini@lanl.gov) (H.M.)

25

26

27

28

29 **Abstract**

30 Lipoarabinomannan (LAM), an amphiphilic lipoglycan of the *Mycobacterium*  
31 *tuberculosis* cell wall, is a diagnostic target for tuberculosis. Previous work from  
32 our laboratory and others suggests that LAM is associated with host serum  
33 lipoproteins, which may in turn have implications for diagnostic assays. Our team  
34 has developed two serum assays for amphiphile detection: lipoprotein capture and  
35 membrane insertion. The lipoprotein capture assay relies on capture of the host  
36 lipoproteins, exploiting the biological association of host lipoprotein with microbial  
37 amphiphilic biomarkers to “concentrate” LAM. In contrast, the membrane insertion  
38 assay is independent of the association between pathogen amphiphiles and host  
39 lipoprotein association, and directly captures LAM based on its thermodynamic  
40 propensity for association with a supported lipid membrane, which forms the  
41 functional surface of an optical biosensor. In this manuscript, we explored the use  
42 of these assays for the detection of LAM in sera from adults whose tuberculosis  
43 status had been well-characterized using conventional microbiological tests, and  
44 endemic controls. Using the lipoprotein capture assay, LAM signal/noise ratios  
45 were >1.0 in 29/35 (83%) individuals with culture-confirmed active tuberculosis,  
46 8/13 (62%) individuals with tuberculosis symptoms but no positive culture for *M.*  
47 *tuberculosis*, and 0/6 (0%) symptom-free endemic controls. To evaluate serum  
48 LAM levels without bias associated with potential differences in circulating host  
49 lipoprotein concentrations between individuals, we subsequently processed  
50 available samples to liberate LAM from associated host lipoprotein assemblies  
51 followed by direct detection of the pathogen biomarker using the membrane

52 insertion approach. Using the membrane insertion assay, signal/noise for  
53 detection of serum LAM was greater than that observed using the lipoprotein  
54 capture method for culture-confirmed TB patients (6/6), yet remained negative for  
55 controls (2/2). Taken together, these results suggest that detection of serum LAM  
56 is a promising TB diagnostic approach. Further work is required to optimize assay  
57 performance and to decipher the implications of LAM/host lipoprotein associations  
58 for diagnostic assay performance and TB pathogenesis.

59

60

61 **INTRODUCTION**

62 Tuberculosis (TB) is the leading cause of global mortality associated with a single  
63 infectious disease, and is estimated to afflict 10 million people worldwide (2018),  
64 with ~ 1.3 million deaths (1). The World Health Organization has identified the need  
65 for a non-sputum diagnostic test for TB, particularly extrapulmonary TB and  
66 pulmonary TB associated with low bacillary burden in airways, as can occur in  
67 young children and in individuals with HIV co-infection (2).

68 Accordingly, several biomarkers have been explored for the empirical diagnosis of  
69 TB, with lipoarabinomannan (LAM) arguably being the most studied (3–5). LAM is  
70 an amphiphilic lipoglycan component of the *Mycobacterium tuberculosis* (MTB)  
71 cell wall that has in vitro immunomodulatory activity including activation of the Toll-  
72 like receptor 2 pathway (14, 17–19). Following the findings of Hamasur *et al.* that  
73 LAM was detectable in mouse urine within one day after intra-peritoneal injection  
74 of crude MTB cell wall extract, most clinical diagnostic work focused on detection  
75 of LAM in urine (9–12). One lateral flow urinary LAM assay is now commercially  
76 available (Alere Determine™ TB LAM Ag, Abbott Biotechnologies). However, the  
77 sensitivity of the Alere assay is suboptimal – ranging from 42% in HIV-negative TB  
78 patients to 53% in TB patients with advanced HIV disease, a condition in which  
79 total mycobacterial burden can be very high and occult renal TB can be present  
80 (13–15). The next generation Fujifilm SILVAMP TB-LAM (FujiLAM; Fujifilm, Tokyo,  
81 Japan), a lateral flow test incorporating high-affinity monoclonal anti-LAM  
82 antibodies and, has 30% better sensitivity compared to Alere LAM but needs

83 further validation in clinical settings ((16). Several other LAM assay formats  
84 including FujiLAM with enhanced sensitivity are in development (10,16,17).  
85 The amphiphilic biochemistry of LAM confers instability in aqueous milieu such as  
86 blood. Previous work from our team has shown that in human blood LAM  
87 associates with host lipoproteins such as high-density lipoproteins (HDL). In  
88 aqueous blood, HDL is a stable lipidic assembly comprised of a core lipid nanodisc  
89 stabilized by coat apolipoproteins (15,16,27). While LAM has been extracted from  
90 the blood of TB patients (20), direct measurement of LAM in blood or serum has  
91 proved to be more elusive, and achieved mainly in individuals with advanced HIV  
92 disease (20–22). We hypothesized that sequestration of LAM in host lipoprotein  
93 assemblies may contribute to the difficulty in detecting the antigen in blood. In  
94 parallel assessment of LAM in serum and urine from TB patients using an  
95 electrochemiluminescence immunoassay, Broger *et al.* showed substantially lower  
96 assay sensitivity in serum than in urine, but that matrix inhibition of serum could  
97 largely be reversed by heat treatment, resulting in substantial increases in LAM  
98 signal in tested sera (23).  
99 To evaluate the impact of serum sequestration of LAM in host lipoprotein  
100 complexes, we measured serum LAM using two methods tailored for the detection  
101 of amphiphilic biomarkers in aqueous matrices (Figure 1) – lipoprotein capture and  
102 membrane insertion. The lipoprotein capture assay (Figure 1) relies on capture of  
103 host lipoproteins, exploiting their biological association with the pathogen  
104 amphiphile to “concentrate” LAM (19,24). In contrast, the membrane insertion  
105 assay (Figure 1) is independent of that host lipoprotein/LAM association, and

106 directly captures LAM based on its thermodynamic propensity for association with  
107 a supported lipid membrane which forms the functional surface of a biosensor  
108 (22,24,25). Although both of these assays are platform ambivalent, we used  
109 enzyme linked immunosorbent assays (ELISA) and fluorescence measurements  
110 from a waveguide-based biosensor platform developed at the Los Alamos National  
111 Laboratory for this study (19,26).

112 In this manuscript, we evaluated the use of the above two assays- lipoprotein  
113 capture and membrane insertion- for the direct detection of LAM in serum from  
114 carefully characterized samples from tuberculosis patients, and endemic controls.

115

## 116 **METHODS**

### 117 **Clinical Specimens**

118 This study used existing stored specimens that previously had been obtained from  
119 participants in Uganda for a study that evaluated the diagnostic accuracy of the  
120 Alere Determine™ TB LAM Ag assay (27). That diagnostic accuracy study enrolled  
121 HIV-positive adults suspected of having active tuberculosis based on the presence  
122 of at least one of cough, fever, night sweats, or weight loss. Individuals were  
123 excluded if they had received more than two days of anti-tuberculosis treatment.  
124 At enrollment, each participant provided two sputum specimens, each of which  
125 was cultured in liquid and solid media. One mycobacterial blood culture, performed  
126 using the Myco/F LYTIC system (Becton and Dickinson, Franklin Lakes, NJ), was  
127 performed for each participant at enrollment. A participant was considered to have  
128 active TB if *M. tuberculosis* was isolated in culture from any specimen. Neither

129 Xpert MTB/RIF nor other nucleic acid amplification test was performed on sputum,  
130 since those tests were not available on-site at the time of study enrollment. At  
131 enrollment, blood was drawn into a BD Vacutainer serum separator tube (Becton  
132 and Dickinson), and serum was subsequently withdrawn and immediately frozen  
133 at -80°C until used for this study. For this exploratory study, one of the investigators  
134 (SED) selected specimens based on knowledge of participant microbiological  
135 classification, with intent to include a representative spectrum of participants with  
136 and without culture-confirmed TB. In addition, serum was obtained from adults in  
137 Uganda who did not have TB symptoms, and were not known to be HIV-positive.  
138 Samples were thawed immediately prior to use for the studies described here. If  
139 multiple assays were performed on a single serum sample, lipoprotein capture was  
140 performed first with the fewest possible freeze/thaw cycles to avoid degradation of  
141 lipoprotein carriers.

142

### 143 **Reagents and Materials**

144 Anti-LAM monoclonal antibody (CS40), rabbit anti-LAM polyclonal antibody, and  
145 purified LAM (H37Rv) used in validation and optimization assays were obtained  
146 from Biodefense and Emerging Infections Resources (BEI resources, Manassas,  
147 VA). Anti-LAM monoclonal antibodies used in the reporter cocktail (see below)  
148 were a generous gift from the Foundation of Innovative New Diagnostics (FIND,  
149 Geneva, Switzerland). Biotinylated anti-ApoA1 antibody (ab27630) was purchased  
150 from Abcam (Cambridge, MA). Alexa Fluor 647 conjugated streptavidin (S21374),  
151 1-Step Ultra TMB-ELISA Substrate Solution (34028), EZ-Link Plus Activated



152 Peroxidase kits, Alexa Fluor 647 labelling kits, and polystyrene flat-bottom 96 well  
153 plates (Corning 9017) were purchased from Thermo Fisher Scientific (Waltham,  
154 MA). Bovine serum albumin (BSA, A7906) and Dulbecco's phosphate buffered  
155 saline (PBS, D1408) were obtained from Sigma Aldrich (St. Louis, MO). Human  
156 serum was obtained from Fischer Scientific Inc (Catalogue. No. BP2657100). 1, 2-  
157 Dioleoyl- sn-glycero-3-phosphocholine (DOPC) and 1, 2-dioleoyl-sn-glycero-3-  
158 phosphoethanolamine-N- (cap biotinyl) (sodium salt) (cap Biotin) were obtained  
159 from Avanti Polar Lipids (Alabaster, AL).

160

### 161 **Waveguide-based Optical Biosensor**

162 The waveguide-based optical biosensor was developed at Los Alamos National  
163 Laboratory and is described in detail elsewhere (26). Waveguides were custom  
164 engineered by nGimat Inc (Norcross, GA) and the surface chemistry was  
165 performed at Spectrum Thin Films (Hauppauge, NY). Silicone gaskets for  
166 waveguide assembly were from Grace Bio-Labs (Bend, OR) and Secure seal  
167 spacers (9 mm diameter x 0.12 mm deep) were from Electron Microscopy  
168 Sciences (Hatfield, PA). Glass microscope slides used as coverslips were  
169 purchased from Thermo Fisher Scientific (Rockford, IL).

170

### 171 **Waveguide Preparation and Flow Cell Assembly**

172 Single mode planar optical waveguides were used for functionalization as  
173 previously described (28). Briefly, waveguides and glass coverslips were cleaned  
174 by sequential sonication in chloroform, ethanol and water (5 min each), followed  
175 by drying under argon stream and exposure to UV-ozone (UVOCS Inc.,

176 Montgomeryville, PA) for 40 min. Flow cells for immunoassays were assembled  
177 using clean waveguides and cover slips, which were bonded together with a  
178 silicone gasket containing a laser cut channel creating a flow cell. Following  
179 assembly, the flow cell was injected with 70  $\mu$ l of lipid micelles (preparation  
180 described below) and then incubated overnight at 4 °C to facilitate vesicle fusion  
181 and lipid bilayer stabilization.

182

### 183 **Lipid Micelle Preparation**

184 1, 2-Dioleoyl-sn-glycero-3-phosphocholine (DOPC) and 1, 2-dioleoyl-sn-glycero-  
185 3-phosphoethanolamine-N- (cap biotinyl) (sodium salt) (cap biotin) were obtained  
186 from Avanti Polar Lipids (Alabaster, AL), resuspended in chloroform and stored at  
187 -20 °C. Lipid micelles for use in waveguide experiments were prepared as  
188 described previously (22). Briefly, 2 mM DOPC and 1% cap biotinyl (mol/mol) were  
189 combined in a glass tube then the chloroform was evaporated off under argon gas.  
190 Lipids were rehydrated in PBS, incubated in the dark for 30 min at room  
191 temperature with shaking (100 rpm) on an orbital shaker. Lipid solutions then  
192 underwent 10 rapid freeze/thaw cycles alternating between liquid nitrogen and  
193 room temperature water. Finally, lipids were probe sonicated for 6 min total (1.0  
194 sec pulse on/off, 10% amplitude) using a Branson ultrasonic generator. Once the  
195 lipids were stabilized, the addition of biotin allowed for the bilayer integrity to be  
196 evaluated during immunoassay experiments by probing with 50–100 pM of a  
197 streptavidin Alexa Fluor 647 conjugate (25,28).

198

## 199 **Waveguide-based Assays**

200 All incubations occurred at room temperature. Dilutions of all reagents were made  
201 in PBS. Flow cells were prepared as described above and the lipid bilayer was  
202 blocked for 1 hr with 2% BSA in PBS (w/v). All incubations were immediately  
203 followed by a wash with 2 mL of 0.5% BSA in PBS (w/v) to remove any unbound  
204 constituents. Incident light from a 635 nm laser (Diode Laser, Coherent, Auburn,  
205 CA) with power adjusted to 440–443  $\mu\text{W}$  was coupled into the waveguide using a  
206 diffraction grating. The response signal was adjusted for maximum peak intensity  
207 using a spectrometer (USB2000, Ocean Optics, Winter Park, FL) interfaced with  
208 the instrument and an optical power meter (Thor Labs, Newton, NJ) (29).

209 The background signal associated with the lipid bilayer and 2% BSA block was  
210 recorded, and then the integrity of the lipid bilayer was assessed by incubation of  
211 50–100 pM streptavidin, AF647 conjugate (Molecular Probes, S32357) for 5 min.  
212 The two control steps are performed in every experiment as intrinsic controls. The  
213 remaining assay steps depended on the particular assay as described below. The  
214 antibodies used in this assay (FIND Clones 171 and 24) were labeled with AF-647,  
215 and the optimal combination of antibodies and their concentrations were  
216 determined using Enzyme Linked Immunosorbent Assays (Figure S1, Section S1,  
217 Supplemental Information). The incubation times for the assays were optimized in  
218 all cases by standard measurements using LAM spiked into commercially procured  
219 human serum. The antigen titrations were performed on the waveguide-based  
220 biosensor.

221        Lipoprotein Capture Assay. Host HDL lipoproteins are nanodiscs of lipids that  
222 are held together by a coat protein, Apolipoprotein A1. The lipoprotein capture  
223 assay utilized an anti-apoA1 capture antibody for the capture of HDL lipoproteins  
224 onto the sensing surface. Following the test for lipid bilayer integrity (instrument  
225 controls), 10 nM unlabeled streptavidin was added and incubated for 10 min to  
226 saturate the biotin embedded in the lipid bilayer. Next, 100 nM of biotin conjugated  
227  $\alpha$ -apoA1 ( $\alpha$ -HDL) antibody was added and incubated for 45 min, allowing for the  
228 capture antibody to adhere to the surface via biotin-streptavidin interaction. The  
229 surface is now functionalized with the capture antibodies for the lipoprotein capture  
230 assay. Prior to experimental measurement, however, the non-specific signal was  
231 determined by incubation of the fluorescence reporter antibody, FIND antibody  
232 cocktail labeled with AF647 (15nM each antibody, for 45 min), with control human  
233 serum on to the waveguide surface. This allows for the determination of the  
234 fluorescence signal associated with the interaction of the reporter antibody with the  
235 surface and control serum, in the absence of the antigen (no-antigen control).

236        Upon completion of the control measurements above, the antigen was added,  
237 and specific interaction between LAM and the reporter antibody cocktail was  
238 measured. To generate standard LAM concentration curves, varying  
239 concentrations of MTB H37RV LAM (100, 250, 500, 1000, 1500, 2500, 5000 nM)  
240 were spiked into commercially procured human serum, and incubated for 24 hours  
241 to allow for complete association with lipoproteins. For clinical specimens, 200  $\mu$ L  
242 of serum was used for each assay, and directly added to the flow cell. Upon  
243 incubation, the FIND reporter cocktail was again added, and the specific signal

244 associated with the binding of LAM with the antibodies was measured via the  
245 spectrometer interface.

246 Three sets of controls were performed (n=25 each). The instrument  
247 background signal is an assessment of the biosensor function and bilayer integrity.  
248 No antigen control experiments were performed using control serum, in the  
249 absence of LAM. Specificity controls were performed using IgG labeled with AF-  
250 647, rather than anti-LAM antibodies, and measuring the signal associated with  
251 their interactions with LAM functionalized on the biosensor surface. In all  
252 experiments, raw data were recorded as relative fluorescence units (RFU) as a  
253 function of wavelength (nm). The specific/non-specific ratio (S/N) was determined  
254 by taking the maximum RFU value for the specific signal, subtracting out the RFU  
255 value for the instrument controls, specificity and no-antigen controls (henceforth  
256 referred to as the background) and dividing this by the maximum RFU value for  
257 the non-specific signal minus the maximum RFU value for the background  
258 **[Equation (1)]**.

$$S/N = \frac{(Specific - Background)}{(NS - Background)}$$

259 **Equation (1)**

260 Membrane Insertion Assay. For this assay, LAM is released from host lipoprotein  
261 complexes prior to detection via a pre-established sample processing method (30).  
262 Briefly, processing was performed using a modified single-phase Bligh and Dyer  
263 chloroform:methanol extraction (30). Chloroform, methanol and LAM sample  
264 (either standard or clinical) were combined in a siliconized microfuge tube (Fisher  
265 Scientific, 02-681-320) at a 1:2:0.8 (v/v) ratio. The chloroform, methanol, and

266 serum mixture was combined by gentle pipetting using low-retention pipet tips to  
267 avoid lipid adherence to the plastic, and then the mixture was centrifuged for 1 min  
268 at 2,000 x g to separate the proteins (supernatant) from the lipid/amphiphilic  
269 molecules (pellet). The supernatant was discarded and the LAM-containing pellet  
270 was resuspended in PBS by gentle pipetting. Following a 5 sec pulse spin to settle  
271 debris that could clog the septum of the biosensor flow cell, the LAM-containing  
272 solution was used as the biomarker sample for immunoassays.

273 There is no need for a capture antibody in the membrane insertion assay format,  
274 as it relies on the direct interaction of the LAM antigen (liberated from carrier  
275 assemblies as described above) into the supported bilayer interface. To generate  
276 standard concentration curves, LAM antigen was diluted to the desired  
277 concentration in control human serum in high-recovery glass vials (Thermo  
278 Scientific, Waltham, MA) C5000-995 and incubated overnight (18–24 hrs) at 4 °C  
279 to allow for association with lipoproteins in serum, as described above the  
280 lipoprotein capture assay. The samples were serially diluted, as described above  
281 for the lipoprotein capture assay. Each dilution was then subject to the sample  
282 processing method, and evaluated in the assay format in order to generate the  
283 standard curve. For the clinical samples, 50  $\mu$ L of each serum sample from  
284 patients and controls was subjected to the sample processing method, and used  
285 in the assay.

286 For this set of assays, the three control measurements described above  
287 (instrument controls, no-antigen control and specificity controls) were performed  
288 (n=10 each) as well, and the concentration of the reporter antibodies was the same

289 as used for the lipoprotein capture assay above (15 nM for 45 min.). For the  
290 experimental measurements, 200  $\mu$ L of the processed sample was incubated in  
291 the flow cell, allowing for association of amphiphilic biomarkers with the lipid  
292 bilayer. Then the FIND antibody cocktail was added again, and incubated (15 nM  
293 for 45 min) for assessment of the specific signal. Raw data were recorded as  
294 relative fluorescence units (RFU) as a function of wavelength (nm).

295 For both the lipoprotein capture assay and the membrane insertion assay, a S/N  
296 ratio > 1.0 was considered a positive result, and each sample measurement was  
297 repeated two times in order to assess reproducibility. The laboratory team  
298 performing LAM assays using participant specimens was blinded to participant  
299 group assignment and other clinical information, and it was held by one of the team  
300 members (SED) as described earlier.

301

302

### 303 **Statistical Analysis**

304 S/N ratios are presented as means  $\pm$  standard deviation. Welch's t-test and Mann-  
305 Whitney U test was used to determine statistical significance. A significance level  
306 (P) of less than 0.05 was considered statistically significant (\*\*P < 0.001, \*\*P <  
307 0.01, or \*P < 0.05). Outlier analysis was performed using Chauvenet's criterion,  
308 which identifies the probability that a given data point reasonably contains all  
309 samples in a data set. LAM concentration curve and all significance tests were  
310 performed using GraphPad Prism (version 9.0.0, from GraphPad Software LLC,  
311 San Diego, CA).

## 312 **Limit of Detection**

313 The limit of detection (LOD) was obtained as described in **Equation (2)**. For a  
314 given sample concentration, the average non-specific signal for all replicates was  
315 obtained and added to three times the standard deviation ( $\sigma$ ), multiplied by the  
316 sample concentration, and divided by the average specific signal for that  
317 concentration. Sample concentration and LOD will be in the same units, therefore  
318 if sample concentration is in nM then LOD will be in nM.

$$\text{LOD} = \frac{(NS + 3\sigma)[\text{Sample}]}{\text{Specific}}$$

319 **Equation (2)**

320

## 321 **RESULTS**

### 322 **Antibody Selection and Optimization:**

323 For both the lipoprotein capture assay and the membrane insertion assay,  
324 antibodies were selected and concentrations determined by Enzyme Linked  
325 Immunosorbent Assays (ELISAs) (Figure S1, Section S1). Briefly, antibodies were  
326 chosen based on sensitivity and specificity for LAM detection, and a combination  
327 of two different monoclonal antibody clones (24 and 171) yielded best outcomes  
328 for LAM detection in serum samples. These two antibodies were used as a cocktail  
329 at 15 nM each for both the membrane insertion and lipoprotein assay formats.

330 **Optimization of the Lipoprotein Capture Assay:** Figure 2a shows a  
331 representative spectral measurement on the waveguide-based biosensor (22,26)  
332 for the measurement of LAM (1.5  $\mu\text{M}$ ) spiked and incubated overnight in control  
333 human serum. RFU is plotted as a function of emission wavelength (nm), as



334 measured on the spectrometer interface associated with the instrument. LAM  
335 concentration curve (Figure 2b) shows a sigmoidal fit with a  $R^2$  value of 0.999.

336 **Optimization of the Membrane Insertion Assay:** Figure 3a shows a  
337 representative spectral measurement for LAM (0.5  $\mu$ M, RFU), using the membrane  
338 insertion assay following extraction from spiked serum. The LAM concentration  
339 curve (Figure 3b) using this method shows a sigmoidal fit with a  $R^2$  value of 0.998  
340 and limit of detection- 8.5nM.

#### 341 **Detection of LAM in Clinical Samples:**

342 Using the lipoprotein capture assay, LAM signal/noise ratio (S/N) was > 1.0 in  
343 29/35 (83%) culture-confirmed TB patients, 8/13 (62%) individuals with TB  
344 symptoms but no positive cultures, and 0/6 (0%) healthy controls. Mean S/N  $\pm$  SD  
345 values were  $3.8 \pm 4.7$ ,  $1.9 \pm 1.4$ , and  $0.6 \pm .20$ , respectively (Table 1, Figure 4).

346 To further understand the LAM lipoprotein capture assay performance, we  
347 stratified culture-confirmed TB patients by specimen source (sputum and/or blood)  
348 of positive MTB culture(s). Surprisingly, there was no association between MTB  
349 detected in blood culture, and LAM detected in serum. Serum LAM S/N was >1.0  
350 in 10/12 (83%) culture-confirmed TB patients with MTB in blood cultures vs. 19/23  
351 (83%) culture-confirmed TB patients whose blood culture was negative for MTB  
352 (relative risk 1.01, 95% CI 0.68, 1.28). Median (IQR) LAM S/N was 2.2 vs 1.3  
353 among culture-confirmed TB patients with vs. without MTB in blood cultures (Table  
354 1).

355 We hypothesized that, if host HDL concentration impacted the outcome of the  
356 lipoprotein capture assay, then use of a LAM assay approach that was

357 independent of host lipoproteins – membrane insertion- might increase assay  
358 analytical sensitivity. Figure 5a shows the comparison of the two methods for  
359 detection of LAM in a serum sample spiked with 500 nM of LAM, with all other  
360 parameters held constant. Specific signal was significantly greater (x10) using the  
361 membrane insertion assay as compared to the lipoprotein capture assay ( $p = 0.04$ ,  
362  $R^2 = 0.99$ ).

363 Subsequently we performed the membrane insertion assay and lipoprotein capture  
364 assay in parallel for eight clinical samples with sufficient volume for comparative  
365 testing (Figure 5b). For serum from culture-confirmed TB patients, the S/N was  
366 uniformly higher for the membrane insertion assay than for the lipoprotein capture  
367 assay; no specific signal was detected in healthy control sera by either assay.

368

## 369 **DISCUSSION**

370 In this exploratory study, we compared and contrasted the use of two tailored  
371 methods for the detection of amphiphilic biomarkers in aqueous samples –  
372 lipoprotein capture and membrane insertion – for the measurement of serum LAM.  
373 Both these methods were able to directly measure LAM in serum, with a  
374 demonstrated enhancement of sensitivity using the membrane insertion method,  
375 In our initial evaluation in serum from adults whose TB status had been rigorously  
376 characterized by conventional mycobacteriology testing, we observed a clear  
377 difference between culture-confirmed TB cases and adult controls with regard to  
378 both proportion with detectable LAM signal and LAM S/Ns. This finding  
379 demonstrates the applicability of these two tailored methods for serum amphiphilic

380 LAM detection.

381 Clinically, there were two unexpected findings. Our working hypothesis – that  
382 serum LAM was associated with presence of MTB in blood cultures – was not  
383 supported by the lipoprotein capture assay data, as serum LAM was detected in  
384 the majority of culture-confirmed TB patients whose blood cultures were negative  
385 for MTB, and further, was not detected in the few patients whose blood cultures  
386 were positive for MTB. This outcome can be either because of an absence of  
387 serum LAM, or simply be associated with a failure to pull-down host lipoprotein  
388 rather. In order to evaluate these two possibilities, we used a membrane insertion  
389 assay that is independent of host serum lipoproteins. Compared to lipoprotein  
390 capture, the membrane insertion assay resulted in higher S/N in all tested TB  
391 patients, but the magnitude of the difference varied from patient to patient. In all,  
392 our results indicate clearly that an assay modality that is independent of variable  
393 host factors (membrane insertion) is more sensitive than one that is dependent on  
394 them (lipoprotein capture). Indeed, a variety of factors can impact host lipoprotein  
395 concentrations, including HIV/AIDS (31,32). Because of insufficient volume of  
396 clinical samples, we were not able to quantitate lipoprotein concentrations to  
397 formally establish an association between serum concentrations of these host  
398 lipoproteins and LAM S/N in TB patients, and this is a weakness of our study. HIV  
399 is associated with quantitative and qualitative lipid abnormalities including low  
400 levels of HDL, disordered HDL metabolism, and reduced Apolipoprotein A levels  
401 (33–35). It is intriguing to speculate that HIV effects on host lipoproteins might  
402 influence host handling of MTB LAM, thereby impacting TB disease

403 pathophysiology in addition to impacting performance of our lipoprotein capture  
404 assay. A better understanding of the mechanisms and kinetics of LAM  
405 sequestration and clearance could have important implications for understanding  
406 tuberculosis and inflammation more broadly.

407 The second unexpected finding was that serum LAM was detectable (using the  
408 lipoprotein capture assay and threshold S/N > 1.0) in over half of TB symptomatic  
409 individuals whose sputum and blood cultures all were negative for MTB. There are  
410 two possible explanations for this: 1) These are false positive results, and detected  
411 signal in the absence of LAM; or 2) MTB LAM was present in serum, but sputum  
412 and blood cultures were falsely negative. Our existing data cannot tease apart  
413 these possibilities. However, we note that all of these individuals were enrolled  
414 with suspected TB disease, and that our assay did not have any false positive  
415 measurements in the control group (0/6). Further, the recognized sensitivity  
416 limitations of mycobacterial culture as a gold standard as well as the recognition  
417 that “TB” is nonbinary and represents a spectrum of conditions including incipient  
418 and subclinical TB, support further investigation of serum LAM as a biomarker  
419 (36,37).

420 There are important limitations of our exploratory study. The sample size was  
421 small, and adult controls all were HIV-negative whereas individuals with TB  
422 symptoms all were HIV-positive. Second, as noted above, serum specimen  
423 volumes precluded performance of both LAM detection methods and HDL  
424 quantitation on all specimens, and therefore we were not able to comprehensively  
425 characterize the associations between serum LAM, host lipoproteins, and HIV

426 serostatus. We hope to address these limitations in future clinical evaluations that  
427 are curated to address out needs.

428 In conclusion, we present two tailored assay strategies for the direct detection of  
429 amphiphilic serum LAM. Our findings highlight the role that host pathogen  
430 interactions play in pathogen amphiphile presentation and the need to account for  
431 these interactions in the design of diagnostic assays. Our findings also raise the  
432 intriguing possibility that serum LAM might be an informative TB biomarker of  
433 incipient or subclinical TB.

434

435

436

437

438 **REFERENCES**

- 439 1. World Health Organization. Global tuberculosis report [Internet]. WHO,  
440 Geneva, Switzerland; 2019. Available from:  
441 [https://www.who.int/tb/publications/global\\_report/en/](https://www.who.int/tb/publications/global_report/en/)
- 442 2. World Health Organization. High-priority target product profiles for new  
443 tuberculosis diagnostics: report of a consensus meeting. In Proceedings of  
444 the WHO/HTM/TB/2014.18. WHO, Geneva, Switzerland; 2014.
- 445 3. Tucci P, González-Sapienza G, Marin M. Pathogen-derived biomarkers for  
446 active tuberculosis diagnosis. *Front Microbiol.* 2014;5:549.
- 447 4. Walzl G, Ronacher K, Hanekom W, Scriba TJ, Zumla A. Immunological  
448 biomarkers of tuberculosis. *Nat Rev Immunol.* 2011;11:343–5.
- 449 5. Goletti D, Petruccioli E, Joosten SA, Ottenhoff THM. Tuberculosis  
450 biomarkers: From diagnosis to protection. *Infect Dis Rep.* 2016;8 (2):6568.
- 451 6. Chatterjee D, Khoo KH. Mycobacterial lipoarabinomannan: An  
452 extraordinary lipoheteroglycan with profound physiological effects.  
453 *Glycobiology.* 1998;8(2):113–20.
- 454 7. Saiga H, Shimada Y, Takeda K. Innate Immune Effectors in Mycobacterial  
455 Infection. *Clin Dev Immunol* [Internet]. 2011;2011:1–8. Available from:  
456 <http://www.hindawi.com/journals/jir/2011/347594/>
- 457 8. Akira S, Takeda K. Toll-like receptor signalling. *Nat Rev Immunol.*  
458 2004;4:499–511.
- 459 9. Hamasur B, Bruchfeld J, Haile M, Pawlowski A, Bjorvatn B, Källenius G, et  
460 al. Rapid diagnosis of tuberculosis by detection of mycobacterial

- 461 lipoarabinomannan in urine. *J Microbiol Methods* [Internet]. 2001  
462 May;45(1):41–52. Available from:  
463 <https://linkinghub.elsevier.com/retrieve/pii/S0167701201002391>
- 464 10. Hamasur B, Bruchfeld J, VanHelden P, Källenius G, Svenson S. A  
465 sensitive urinary lipoarabinomannan test for tuberculosis. *PLoS One*.  
466 2015;10(4):e0123457.
- 467 11. Sigal GB, Pinter A, Lowary TL, Kawasaki M, Li A, Mathew A, et al. A novel  
468 sensitive immunoassay targeting the 5-methylthio-D-xylofuranose–  
469 lipoarabinomannan epitope meets the WHO’s performance target for  
470 tuberculosis diagnosis. *J Clin Microbiol*. 2018;
- 471 12. Broger T, Sossen B, du Toit E, Kerkhoff AD, Schutz C, Ivanova Reipold E,  
472 et al. Novel lipoarabinomannan point-of-care tuberculosis test for people  
473 with HIV: a diagnostic accuracy study. *Lancet Infect Dis*. 2019;19:852–61.
- 474 13. Kleinnijenhuis J, Oosting M, Joosten L a B, Netea MG, Van Crevel R.  
475 Innate Immune Recognition of *Mycobacterium tuberculosis*. *Clin Dev*  
476 *Immunol* [Internet]. 2011;2011:1–12. Available from:  
477 <http://www.hindawi.com/journals/jir/2011/405310/>
- 478 14. Gupta-Wright A, Peters JA, Flach C, Lawn SD. Detection of  
479 lipoarabinomannan (LAM) in urine is an independent predictor of mortality  
480 risk in patients receiving treatment for HIV-associated tuberculosis in sub-  
481 Saharan Africa: A systematic review and meta-analysis. *BMC Med*.  
482 2016;14:53.
- 483 15. Reid MJ, Shah NS. Approaches to tuberculosis screening and diagnosis in



- 484 people with HIV in resource-limited settings. *Lancet Infect Dis*.  
485 2009;9(3):173–84.
- 486 16. Bjerrum S, Broger T, Székely R, Mitarai S, Opintan JA, Kenu E, et al.  
487 Diagnostic Accuracy of a Novel and Rapid Lipoarabinomannan Test for  
488 Diagnosing Tuberculosis Among People With Human Immunodeficiency  
489 Virus. *Open Forum Infect Dis* [Internet]. 2020 Jan 1;7(1). Available from:  
490 <https://academic.oup.com/ofid/article/doi/10.1093/ofid/ofz530/5682734>
- 491 17. Lawn SD. Point-of-care detection of lipoarabinomannan (LAM) in urine for  
492 diagnosis of HIV-associated tuberculosis: a state of the art review. *BMC*  
493 *Infect Dis* [Internet]. 2012 Dec 26;12(1):103. Available from:  
494 <https://bmcinfectdis.biomedcentral.com/articles/10.1186/1471-2334-12-103>
- 495 18. Mukundan H, Kubicek-Sutherland JZ, Jakhar S, Noormohamed A,  
496 Sakamuri R, Swanson BI, et al. Immunoassays for the differentiation of  
497 bacterial pathogens in human serum. 15640865, 2017.
- 498 19. Sakamuri RM, Price DN, Lee M, Cho SN, Barry CE, Via LE, et al.  
499 Association of lipoarabinomannan with high density lipoprotein in blood:  
500 Implications for diagnostics. *Tuberculosis*. 2013;93(3):301–7.
- 501 20. Dudchenko A, Averbakh M, Karpina N, Ergeshov A. Capacities of blood  
502 serum lipoarabinomannan in the diagnosis of tuberculosis at a late stage of  
503 HIV infection. *Eur Respir J*. 2018;52:PA4738.
- 504 21. Owens NA, Young CC, Laurentius LB, De P, Chatterjee D, Porter MD.  
505 Detection of the tuberculosis biomarker mannose-capped  
506 lipoarabinomannan in human serum: Impact of sample pretreatment with

- 507 perchloric acid. *Anal Chim Acta*. 2019;1046:140–7.
- 508 22. Mukundan H, Kumar S, Price DN, Ray SM, Lee Y-J, Min S, et al. Rapid  
509 detection of *Mycobacterium tuberculosis* biomarkers in a sandwich  
510 immunoassay format using a waveguide-based optical biosensor.  
511 *Tuberculosis* [Internet]. 2012 Sep;92(5):407–16. Available from:  
512 <https://linkinghub.elsevier.com/retrieve/pii/S1472979212001278>
- 513 23. Broger T, Tsionksy M, Mathew A, Lowary TL, Pinter A, Plisova T, et al.  
514 Sensitive electrochemiluminescence (ECL) immunoassays for detecting  
515 lipoarabinomannan (LAM) and ESAT-6 in urine and serum from  
516 tuberculosis patients. *PLoS One*. 2019;14(4):e0215443.
- 517 24. Kubicek-Sutherland JZ, Vu DM, Noormohamed A, Mendez HM, Stromberg  
518 LR, Pedersen CA, et al. Direct detection of bacteremia by exploiting host-  
519 pathogen interactions of lipoteichoic acid and lipopolysaccharide. *Sci Rep*.  
520 2019;9:6203.
- 521 25. Sakamuri RM, Capek P, Dickerson TJ, Barry CE, Mukundan H, Swanson  
522 BI. Detection of stealthy small amphiphilic biomarkers. *J Microbiol*  
523 *Methods*. 2014;103:112–7.
- 524 26. Mukundan H, Anderson AS, Grace WK, Grace KM, Hartman N, Martinez  
525 JS, et al. Waveguide-based biosensors for pathogen detection. *Sensors*.  
526 2009;9(7):5783–809.
- 527 27. Nakiyingi L, Moodley VM, Manabe YC, Nicol MP, Holshouser M, Armstrong  
528 DT, et al. Diagnostic Accuracy of a Rapid Urine Lipoarabinomannan Test  
529 for Tuberculosis in HIV-Infected Adults. *JAIDS J Acquir Immune Defic*

- 530           Syndr [Internet]. 2014 Jul;66(3):270–9. Available from:  
531           <http://journals.lww.com/00126334-201407010-00005>
- 532   28.   Martinez JS, Grace WK, Grace KM, Hartman N, Swanson BI. Pathogen  
533   detection using single mode planar optical waveguides. *J Mater Chem*  
534   [Internet]. 2005;15(43):4639. Available from:  
535   <http://xlink.rsc.org/?DOI=b502329g>
- 536   29.   Noormohamed A, Stromberg LR, Anderson AS, Karim Z, Dighe P,  
537   Kempaiah P, et al. Detection of lipopolysaccharides in serum using a  
538   waveguide-based optical biosensor. In: Côté GL, editor. *Optical*  
539   *Diagnostics and Sensing XVII: Toward Point-of-Care Diagnostics* [Internet].  
540   2017. p. 100720A. Available from:  
541   <http://proceedings.spiedigitallibrary.org/proceeding.aspx?doi=10.1117/12.2>  
542   253506
- 543   30.   Bligh EG, Dyer WJ. A rapid method of total lipid extraction and purification.  
544   *Can J Biochem Physiol.* 1959;37(8):911–7.
- 545   31.   Rose H, Hoy J, Woolley I, Tchoua U, Bukrinsky M, Dart A, et al. HIV  
546   infection and high density lipoprotein metabolism. *Atherosclerosis.* 2008;
- 547   32.   Njoroge A, Guthrie BL, Bosire R, Wener M, Kiarie J, Farquhar C. Low HDL-  
548   cholesterol among HIV-1 infected and HIV-1 uninfected individuals in  
549   Nairobi, Kenya. *Lipids Health Dis.* 2017;
- 550   33.   Duprez DA, Kuller LH, Tracy R, Otvos J, Cooper DA, Hoy J, et al.  
551   Lipoprotein particle subclasses, cardiovascular disease and HIV infection.  
552   *Atherosclerosis.* 2009;

- 553 34. Enkhmaa B, Anuurad E, Zhang W, Abbuthalha A, Li XD, Dotterweich W, et  
554 al. HIV disease activity as a modulator of lipoprotein(a) and allele-specific  
555 apolipoprotein(a) levels. *Arterioscler Thromb Vasc Biol.* 2013;
- 556 35. Riddler SA, Smit E, Cole SR, Li R, Chmiel JS, Dobs A, et al. Impact of HIV  
557 Infection and HAART on Serum Lipids in Men. *J Am Med Assoc.* 2003;
- 558 36. Esmail H, Barry CE, Young DB, Wilkinson RJ. The ongoing challenge of  
559 latent tuberculosis. *Philosophical Transactions of the Royal Society B:  
560 Biological Sciences.* 2014.
- 561 37. Drain PK, Bajema KL, Dowdy D, Dheda K, Naidoo K, Schumacher SG, et  
562 al. Incipient and subclinical tuberculosis: A clinical review of early stages  
563 and progression of infection. *Clinical Microbiology Reviews.* 2018.

564

565

## 566 **Ethics**

567 This study was approved by ethics committees of Johns Hopkins University School  
568 of Medicine, the Joint Clinical Research Centre (Kampala, Uganda), and Los  
569 Alamos National Laboratories.

570

571

572

## 573 **ACKNOWLEDGEMENTS**

574 We thank Mr. Aaron S. Anderson and Dr. Jessica Kubicek-Sutherland for technical  
575 guidance, assistance and helpful discussions during the course of this work. We

576 are grateful to the patients from Uganda for their participation in the study. The  
577 authors thank Dr. Mark Perkins, who was then at the Foundation for Innovative  
578 New Diagnostics and now, at the World Health Organization, for his help in  
579 establishing the initial collaborations essential for this work. This work was  
580 supported by Los Alamos LDRD Directed Research Grant (Co-PI Mukundan) and  
581 grant R21 AI03599 to Dr. Susan Dorman from the National Institutes of Health.  
582 Los Alamos National Laboratory, an affirmative action equal opportunity  
583 employer, is managed by Triad National Security, LLC for the U.S. Department of  
584 Energy's NNSA, under contract 89233218CNA000001.

585

586

#### 587 **AUTHOR CONTRIBUTIONS**

588 H.M., S.J. and S.D. designed the experiments. S.J., D.M.V., H.M.M., R.S., and  
589 P.D. performed experiments. S.J., D.M.V., H.M.M., R.S., E.M., S.D., and H.M.  
590 analyzed the data. S.J. and H.M. wrote the manuscript, with extensive input from  
591 S.D and E.M. E.M. assisted with procurement of key reagents and requirements  
592 for the study. S.D. led the clinical enrollment and recruitment for the study. All  
593 authors assisted in editing the manuscript.

594

#### 595 **COMPETING FINANCIAL INTERESTS**

596 Scientists from the Los Alamos National Laboratories, operated by the Triad LLC,  
597 that are authors on this manuscript, do not have competing interests, and are not  
598 consultants for any competing interests.

599 **FIGURE LEGENDS**

600 **Figure 1. Overview of Lipoarabinomannan (LAM) detection strategies.** When  
601 LAM is associated with a host lipoprotein carrier such as HDL, detection can be  
602 performed using lipoprotein capture, which requires two antibodies, as well as prior  
603 knowledge of LAM-lipoprotein carrier associations. An antibody targeting  
604 apolipoprotein A1, the coat protein of HDL, is used to capture the nanodiscs on the  
605 assay surface, followed by detection with a fluorescently labeled antibody targeting  
606 LAM. In the absence of sequestration by a host lipoprotein carrier, LAM can be  
607 directly detected by membrane insertion, which requires only one antibody. The  
608 amphiphilic antigen, LAM, is allowed to partition into a supported lipid bilayer  
609 interface, followed by detection with a specific fluorescently labeled antibody.  
610 Graphic representations are not drawn to scale. Figure created with  
611 BioRender.com.

612

613

614 **Figure 2. Assay optimization for the detection of LAM in human serum by**  
615 **lipoprotein capture assay.** Measurement of LAM by lipoprotein capture assay,  
616 as a function of concentration. **(a)** Representative spectral measurement of LAM  
617 (1.5  $\mu$ M) incubated overnight at 4 °C in control human serum, with the specific  
618 signal (Relative Fluorescence Units, RFU) from the detection  $\alpha$ -LAM antibody (15  
619 nM) as a function of emission wavelength (nm). The background and non-specific  
620 signals are measured before the addition of LAM. **(b)** Lipoprotein capture assay  
621 was performed for the detection of LAM spiked into control serum at various

622 concentrations and incubated overnight to allow incorporation of the amphiphile  
623 into carrier assemblies. Results are plotted as RFU as measured on the  
624 waveguide-based optical biosensor, at increasing concentrations of LAM. All  
625 values given in **(b)** are the mean  $\pm$  standard deviation derived from at least two  
626 independent determinations ( $n = 2$ ). Statistical significance was determined by  
627 Welch's t test using Graph pad Prism 8.

628

629 **Figure 3. Assay optimization for the detection of LAM in human serum by**  
630 **membrane insertion assay.** Measurement of LAM by membrane insertion assay,  
631 as a function of concentration. **(a)** Representative spectral measurement of LAM  
632 ( $.5 \mu\text{M}$ ) incubated overnight at  $4^\circ\text{C}$  in control human serum, with the specific signal  
633 (Relative Fluorescence Units, RFU) from the detection  $\alpha$ -LAM antibody ( $15 \text{ nM}$ ) as  
634 a function of emission wavelength (nm). The background and non-specific signals  
635 are measured before the addition of LAM. **(b)** Membrane insertion assay was  
636 performed for the detection of LAM spiked into control serum at various  
637 concentrations and incubated overnight to allow incorporation of the amphiphile  
638 into carrier assemblies. Sample processing was done to remove lipoproteins.  
639 Results are plotted as RFU as measured on the waveguide-based optical  
640 biosensor, at increasing concentrations of LAM. All values given in **(b)** are the  
641 mean  $\pm$  standard deviation derived from at least two independent determinations  
642 ( $n = 2$ ). Statistical significance was determined by Welch's t test using Graph pad  
643 Prism 8.

644

645

646 **Figure 4. Direct detection of LAM in patient serum samples.** Detection of LAM  
647 in clinical serum samples using the lipoprotein capture assay. Data are presented  
648 as the Signal/Noise (S/N) ratio with a value above 1.0 indicating a positive result.  
649 The measured S/N in sera from 54 patients from 3 different categories (see legend)  
650 is shown as box and whisker plot. Statistical significance was determined by Mann-  
651 Whitney U test (\* $P=0.0032$ , \*\* $P=0.1141$ , \*\*\* $P=0.0111$ )

652

653 **Figure 5. Comparison of Lipoprotein capture and Membrane Insertion. (a)**  
654 Representative measurement of LAM (0.5  $\mu\text{M}$ ), by lipoprotein capture (black  
655 bars) and membrane insertion assay (grey bars), incubated overnight at 4 °C in  
656 control human serum, with the specific signal (RFU) from the detection of  $\alpha$ -LAM  
657 antibody (15 nM). Values are the mean  $\pm$  standard deviation derived from at  
658 least two independent determinations ( $n = 2$ ). Statistical significance was  
659 determined by Welch's t test (\* $P < 0.05$ ). **(b)** Comparison of LAM detection signal  
660 by lipoprotein capture (black bars) and membrane insertion assay (grey bars) in  
661 patient serum samples. Data are presented as the S/N ratio with a value over 1  
662 indicating a positive result. Samples 14, 3, 4, 27, 22 and 24 are positive for LAM  
663 by either blood or sputum culture methods, whereas samples 52, 53 are healthy  
664 controls.

665

666



667 **TABLE**

668

**Table 1. Signal to noise ratios, by clinical group, for the lipoprotein capture assay**

| Clinical group | n         | Description                                                                      | % with SNR>1.0 (n/n) | SNR median (IQR)      | SNR mean (SD)    |
|----------------|-----------|----------------------------------------------------------------------------------|----------------------|-----------------------|------------------|
| <b>1</b>       | <b>35</b> | <b>TB symptoms, MTB culture positive (HIV-positive)</b>                          | <b>83 (29/35)</b>    | <b>2.1 (1.1, 3.8)</b> | <b>3.8 (4.8)</b> |
|                | 9         | <i>Subgroup: sputum culture positive for MTB, blood culture positive for MTB</i> | <i>100 (9/9)</i>     | <i>2.2 (1.3, 7.5)</i> | <i>5.0 (6.8)</i> |
|                | 3         | <i>Subgroup: sputum culture negative for MTB, blood culture positive for MTB</i> | <i>33 (1/3)</i>      | <i>0.9 (0.9, 6.6)</i> | <i>2.8 (3.3)</i> |
|                | 23        | <i>Subgroup: sputum culture positive for MTB, blood culture negative for MTB</i> | <i>83 (19/23)</i>    | <i>2.5 (1.2, 3.8)</i> | <i>3.5 (4.0)</i> |
| <b>2</b>       | <b>13</b> | <b>TB symptoms, all MTB cultures negative (HIV-positive)</b>                     | <b>62 (8/13)</b>     | <b>1.3 (0.9, 3.2)</b> | <b>1.9 (1.4)</b> |
| <b>3</b>       | <b>6</b>  | <b>Asymptomatic controls (HIV-negative)</b>                                      | <b>0 (0/6)</b>       | <b>0.6 (0.5, 0.8)</b> | <b>0.6 (0.2)</b> |

669

Abbreviations: SNR, signal to noise ratio; IQR, interquartile range; SD, standard deviation; MTB, *Mycobacterium tuberculosis*

670

671

672

673

674

675

Figure 1

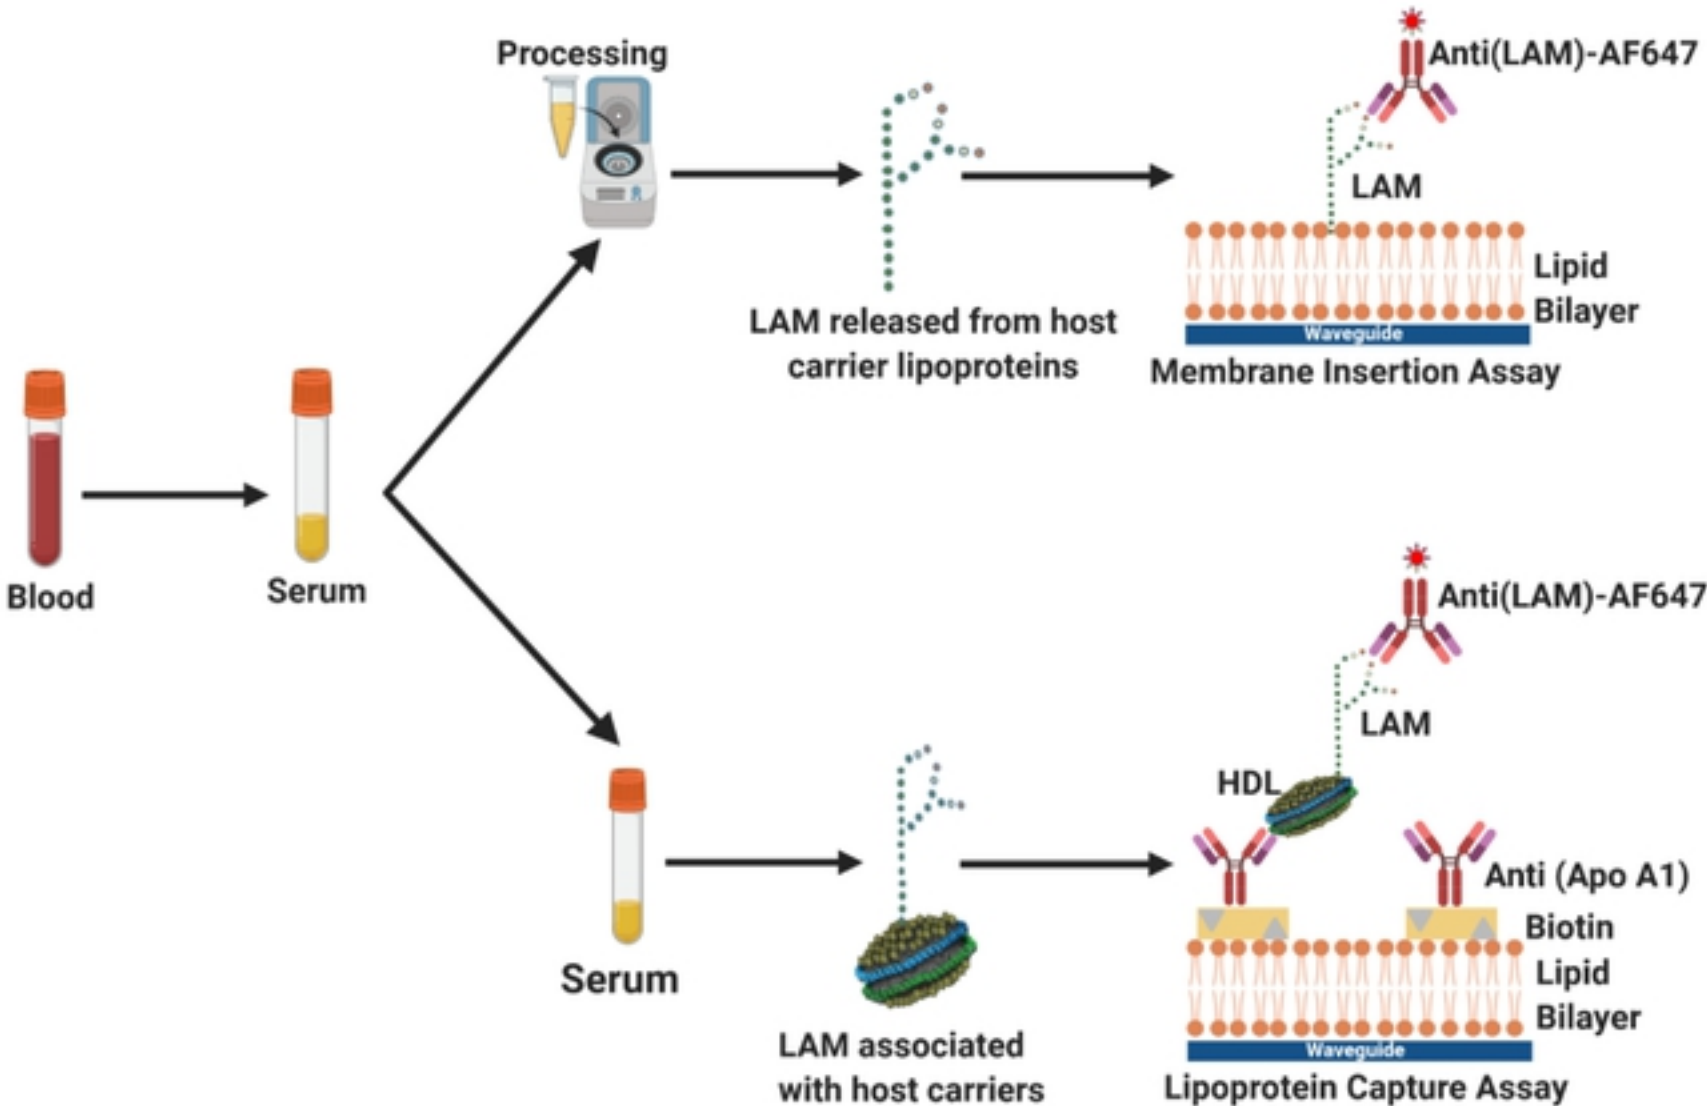

Figure 2

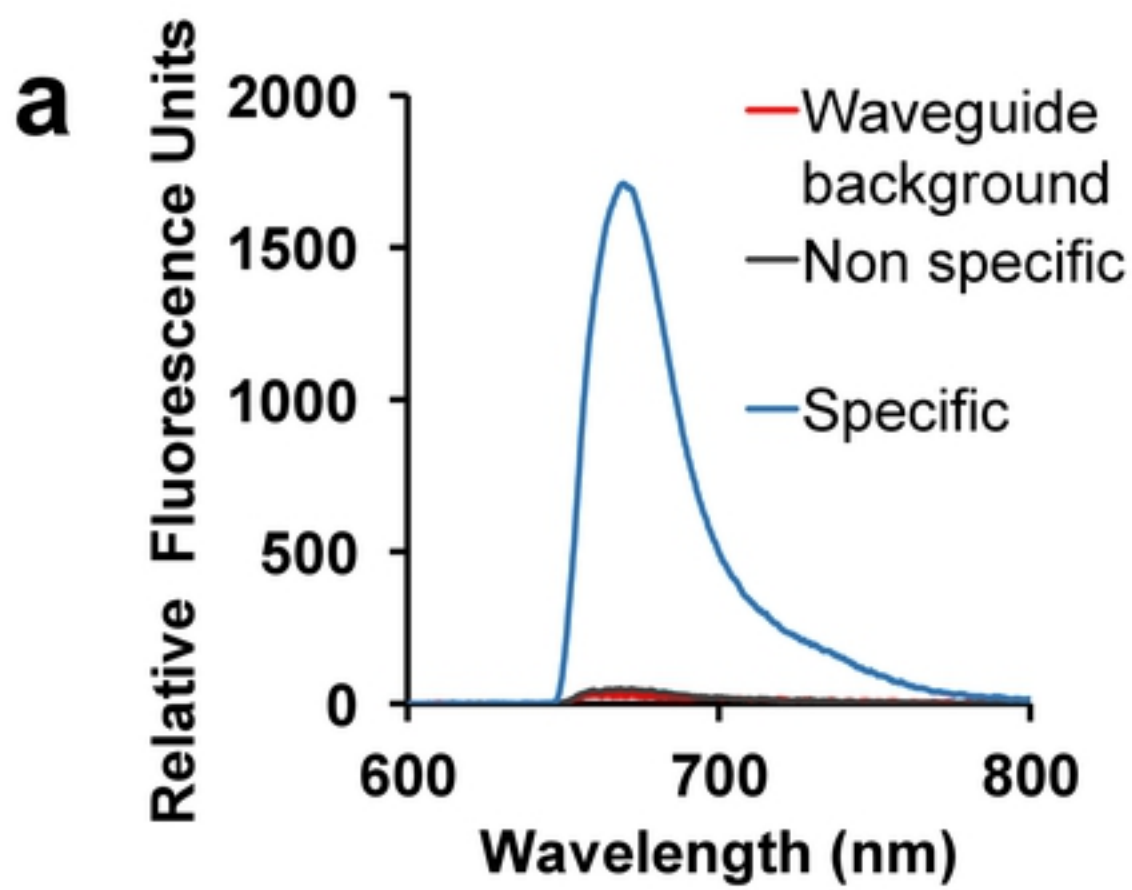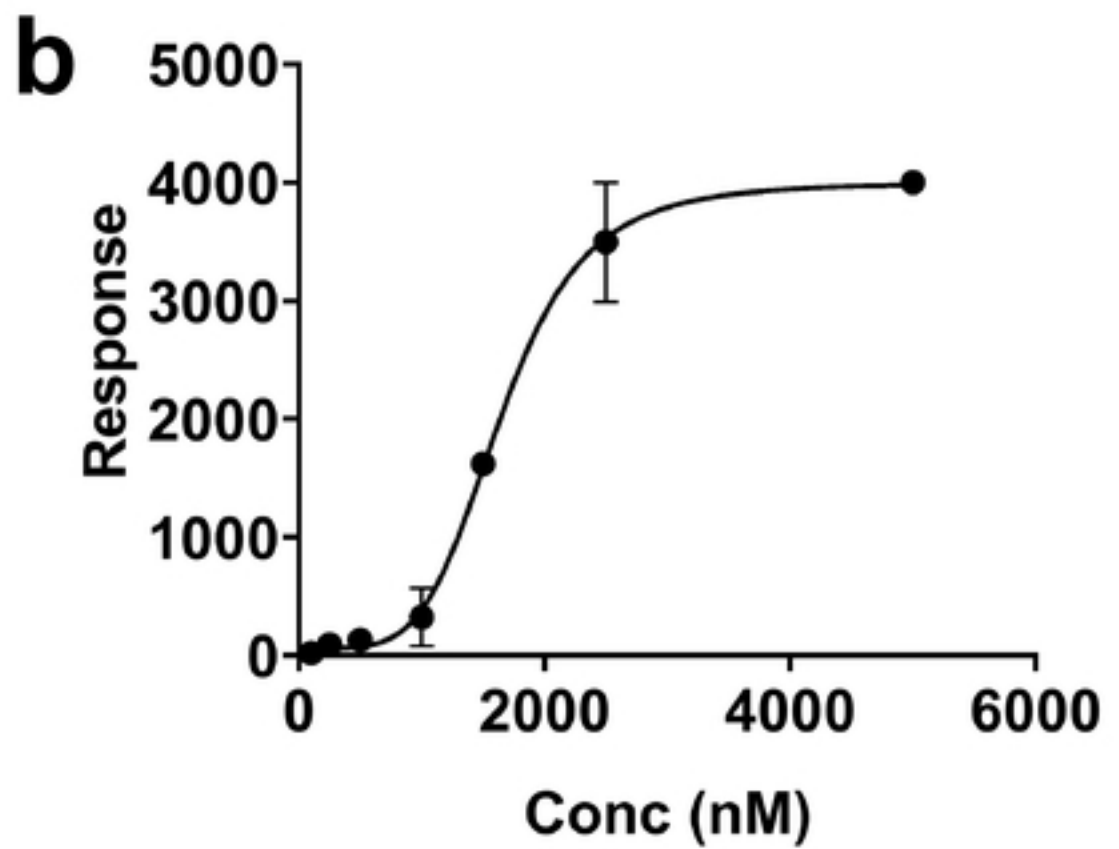

Figure 3

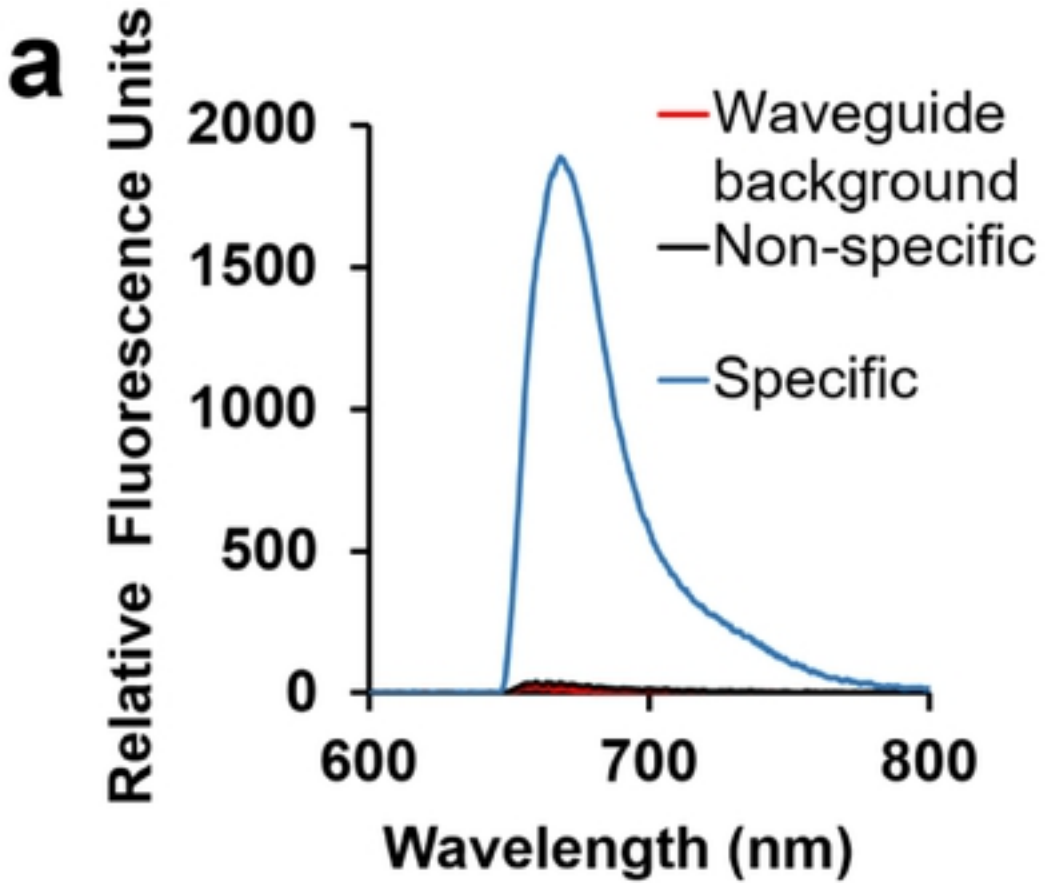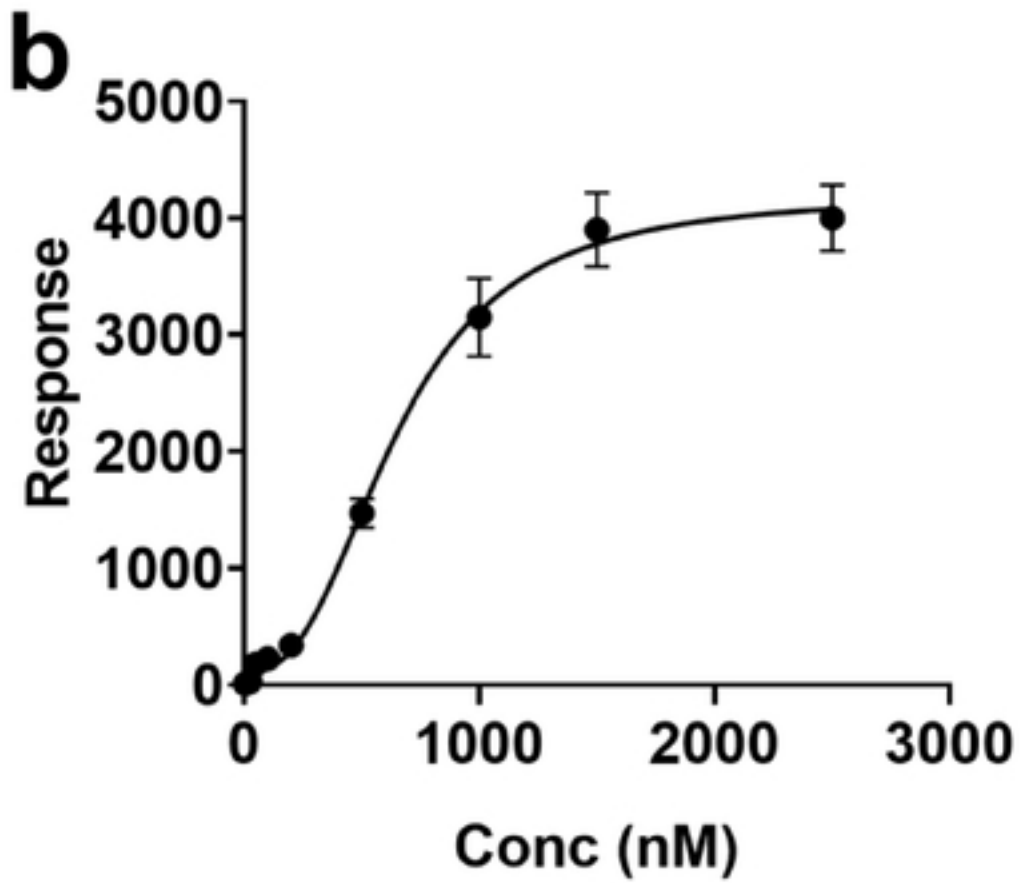

**Figure 4**

- 1: TB symptoms, MTB culture positive (HIV-positive) (n=35)
- 2: TB symptoms, all MTB cultures negative (HIV-positive) (n=13)
- 3: asymptomatic controls (HIV-negative) (n=6)

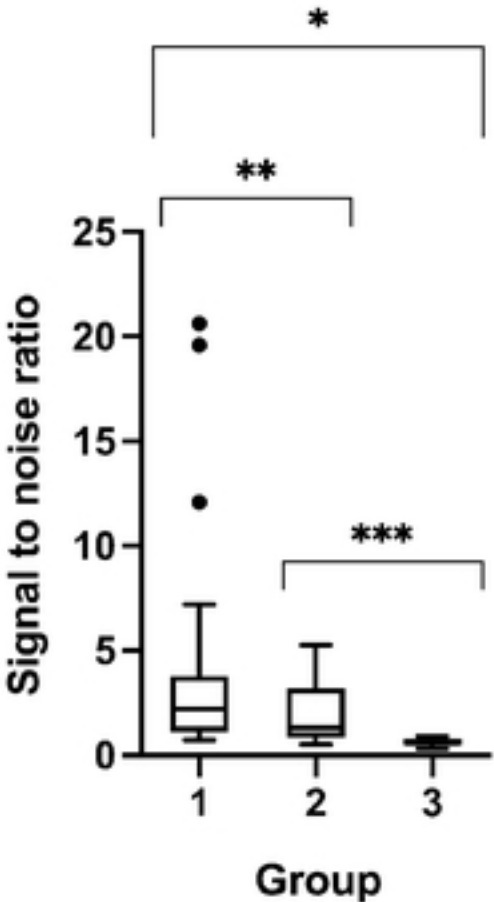

Figure 5

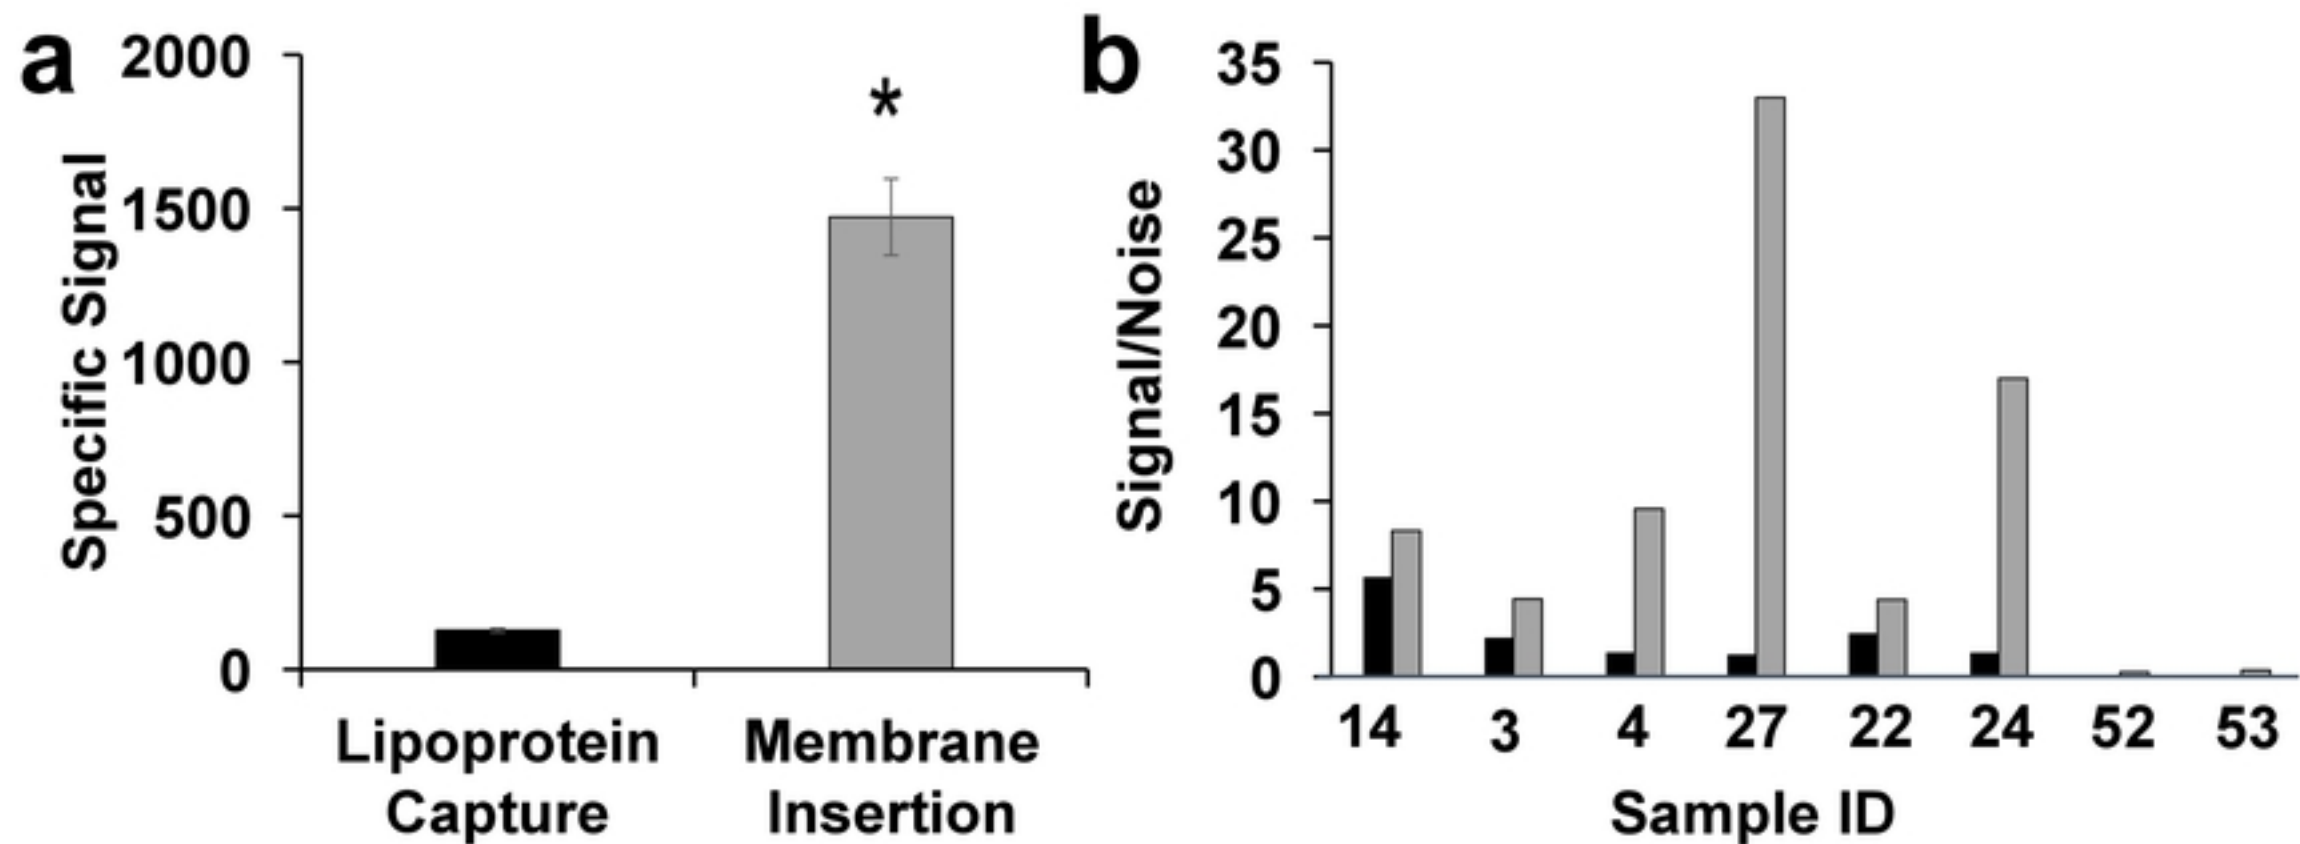

**Table 1. Signal to noise ratios, by clinical group, for the lipoprotein capture assay**

| Clinical group | n         | Description                                                                      | % with SNR>1.0 (n/n) | SNR median (IQR)      | SNR mean (SD)    |
|----------------|-----------|----------------------------------------------------------------------------------|----------------------|-----------------------|------------------|
| <b>1</b>       | <b>35</b> | <b>TB symptoms, MTB culture positive (HIV-positive)</b>                          | <b>83 (29/35)</b>    | <b>2.1 (1.1, 3.8)</b> | <b>3.8 (4.8)</b> |
|                | 9         | <i>Subgroup: sputum culture positive for MTB, blood culture positive for MTB</i> | 100 (9/9)            | 2.2 (1.3, 7.5)        | 5.0 (6.8)        |
|                | 3         | <i>Subgroup: sputum culture negative for MTB, blood culture positive for MTB</i> | 33 (1/3)             | 0.9 (0.9, 6.6)        | 2.8 (3.3)        |
|                | 23        | <i>Subgroup: sputum culture positive for MTB, blood culture negative for MTB</i> | 83 (19/23)           | 2.5 (1.2, 3.8)        | 3.5 (4.0)        |
| <b>2</b>       | <b>13</b> | <b>TB symptoms, all MTB cultures negative (HIV-positive)</b>                     | <b>62 (8/13)</b>     | <b>1.3 (0.9, 3.2)</b> | <b>1.9 (1.4)</b> |
| <b>3</b>       | <b>6</b>  | <b>Asymptomatic controls (HIV-negative)</b>                                      | <b>0 (0/6)</b>       | <b>0.6 (0.5, 0.8)</b> | <b>0.6 (0.2)</b> |

Abbreviations: SNR, signal to noise ratio; IQR, interquartile range; SD, standard deviation; MTB, *Mycobacterium tuberculosis*
